# Supplementary material
Source: PubMed Central journal article supplement (PMC3401899)
Supplement: NIHMS384726-supplement.pdf [file NIHMS384726-supplement.pdf]

Supplementary Table 1. Gene-based association of circadian genes with bipolar I disorder (BPI)

| <b>Gene</b>     | <b>SNPs (n)</b> | <b>Disorder</b> | <b>Model</b> | <b><math>\chi^2</math></b> | <b>p-value</b> |
|-----------------|-----------------|-----------------|--------------|----------------------------|----------------|
| <i>ANAT</i>     | 4               | BPI             | A            | 1.997                      | 0.482          |
| <i>AANAT</i>    | 4               | BPI             | D            | 1.811                      | 0.538          |
| <i>AANAT</i>    | 4               | BPI             | R            | 1.818                      | 0.550          |
| <i>ARNTL</i>    | 22              | BPI             | A            | 4.293                      | 0.422          |
| <i>ARNTL</i>    | 22              | BPI             | D            | 4.050                      | 0.566          |
| <i>ARNTL</i>    | 22              | BPI             | R            | 2.854                      | 0.800          |
| <i>ARNTL2</i>   | 25              | BPI             | R            | 4.067                      | 0.559          |
| <i>ARNTL2</i>   | 25              | BPI             | D            | 4.068                      | 0.591          |
| <i>ARNTL2</i>   | 25              | BPI             | A            | 3.171                      | 0.699          |
| <i>BHLHB3</i>   | 4               | BPI             | A            | 0.786                      | 0.708          |
| <i>BHLHB3</i>   | 4               | BPI             | D            | 0.860                      | 0.717          |
| <i>BHLHB3</i>   | 4               | BPI             | R            | 0.471                      | 0.868          |
| <i>CLOCK</i>    | 10              | BPI             | D            | 5.096                      | 0.142          |
| <i>CLOCK</i>    | 10              | BPI             | R            | 3.578                      | 0.434          |
| <i>CLOCK</i>    | 10              | BPI             | A            | 2.556                      | 0.524          |
| <i>CNR1</i>     | 17              | BPI             | R            | 4.971                      | 0.304          |
| <i>CNR1</i>     | 17              | BPI             | D            | 3.233                      | 0.623          |
| <i>CNR1</i>     | 17              | BPI             | A            | 2.629                      | 0.643          |
| <i>CRY2</i>     | 7               | BPI             | R            | 5.443                      | 0.119          |
| <i>CRY2</i>     | 7               | BPI             | A            | 4.967                      | 0.133          |
| <i>CRY2</i>     | 7               | BPI             | D            | 1.486                      | 0.768          |
| <i>CSNK1D</i>   | 1               | BPI             | R            | 3.077                      | 0.125          |
| <i>CSNK1D</i>   | 1               | BPI             | A            | 0.286                      | 0.613          |
| <i>CSNK1D</i>   | 1               | BPI             | D            | 0.001                      | 1.000          |
| <i>CSNK1E</i>   | 9               | BPI             | R            | 6.251                      | 0.098          |
| <i>CSNK1E</i>   | 9               | BPI             | A            | 5.354                      | 0.140          |
| <i>CSNK1E</i>   | 9               | BPI             | D            | 3.728                      | 0.354          |
| <i>CSNK2A1</i>  | 7               | BPI             | D            | 5.274                      | 0.136          |
| <i>CSNK2A1</i>  | 7               | BPI             | R            | 2.372                      | 0.551          |
| <i>CSNK2A1</i>  | 7               | BPI             | A            | 1.527                      | 0.687          |
| <i>DBP</i>      | 2               | BPI             | R            | 2.109                      | 0.273          |
| <i>DBP</i>      | 2               | BPI             | D            | 1.578                      | 0.377          |
| <i>DBP</i>      | 2               | BPI             | A            | 0.703                      | 0.632          |
| <i>EGR3</i>     | 3               | BPI             | R            | 7.248                      | 0.014          |
| <i>EGR3</i>     | 3               | BPI             | A            | 7.659                      | 0.020          |
| <i>EGR3</i>     | 3               | BPI             | D            | 2.613                      | 0.288          |
| <i>FLJ20516</i> | 5               | BPI             | D            | 4.334                      | 0.184          |
| <i>FLJ20516</i> | 5               | BPI             | A            | 3.796                      | 0.209          |
| <i>FLJ20516</i> | 5               | BPI             | R            | 1.885                      | 0.608          |
| <i>NFIL3</i>    | 9               | BPI             | D            | 3.129                      | 0.448          |
| <i>NFIL3</i>    | 9               | BPI             | A            | 2.497                      | 0.575          |
| <i>NFIL3</i>    | 9               | BPI             | R            | 2.136                      | 0.699          |
| <i>NPAS2</i>    | 60              | BPI             | A            | 6.629                      | 0.326          |
| <i>NPAS2</i>    | 60              | BPI             | D            | 5.686                      | 0.553          |
| <i>NPAS2</i>    | 60              | BPI             | R            | 5.077                      | 0.701          |

|                 |    |     |   |       |       |
|-----------------|----|-----|---|-------|-------|
| <i>NR1D1</i>    | 6  | BPI | D | 2.973 | 0.385 |
| <i>NR1D1</i>    | 6  | BPI | R | 3.107 | 0.409 |
| <i>NR1D1</i>    | 6  | BPI | A | 2.316 | 0.456 |
| <i>PER1</i>     | 2  | BPI | R | 4.005 | 0.111 |
| <i>PER1</i>     | 2  | BPI | D | 0.810 | 0.544 |
| <i>PER1</i>     | 2  | BPI | A | 0.150 | 0.893 |
| <i>PER2</i>     | 9  | BPI | R | 7.226 | 0.062 |
| <i>PER2</i>     | 9  | BPI | A | 3.587 | 0.336 |
| <i>PER2</i>     | 9  | BPI | D | 1.828 | 0.849 |
| <i>PER3</i>     | 14 | BPI | R | 3.663 | 0.487 |
| <i>PER3</i>     | 14 | BPI | D | 2.145 | 0.784 |
| <i>PER3</i>     | 14 | BPI | A | 1.500 | 0.847 |
| <i>RORB</i>     | 46 | BPI | R | 7.436 | 0.203 |
| <i>RORB</i>     | 46 | BPI | D | 5.403 | 0.475 |
| <i>RORB</i>     | 46 | BPI | A | 4.907 | 0.500 |
| <i>TIMELESS</i> | 6  | BPI | R | 3.072 | 0.271 |
| <i>TIMELESS</i> | 6  | BPI | A | 0.332 | 0.968 |
| <i>TIMELESS</i> | 6  | BPI | D | 0.251 | 0.993 |

SNP = single nucleotide polymorphism.

Supplementary Table 2. Gene-based association of circadian genes with schizophrenia (SZ)/schizoaffective disorder (SZA)

| <b>Gene</b> | <b>Count of SNPs</b> | <b>Disorder</b> | <b>Model</b> | <b><math>\chi^2</math></b> | <b>p-value</b> |
|-------------|----------------------|-----------------|--------------|----------------------------|----------------|
| AANAT       | 4                    | SZ/SZA          | A            | 3.101                      | 0.268          |
| AANAT       | 4                    | SZ/SZA          | D            | 2.817                      | 0.340          |
| AANAT       | 4                    | SZ/SZA          | R            | 2.747                      | 0.345          |
| ARNTL       | 22                   | SZ/SZA          | A            | 3.334                      | 0.621          |
| ARNTL       | 22                   | SZ/SZA          | R            | 2.424                      | 0.882          |
| ARNTL       | 22                   | SZ/SZA          | D            | 2.346                      | 0.913          |
| ARNTL2      | 25                   | SZ/SZA          | D            | 6.360                      | 0.196          |
| ARNTL2      | 25                   | SZ/SZA          | R            | 4.700                      | 0.434          |
| ARNTL2      | 25                   | SZ/SZA          | A            | 3.236                      | 0.678          |
| BHLHB3      | 4                    | SZ/SZA          | R            | 0.600                      | 0.829          |
| BHLHB3      | 4                    | SZ/SZA          | D            | 0.282                      | 0.940          |
| BHLHB3      | 4                    | SZ/SZA          | A            | 0.100                      | 0.985          |
| CLOCK       | 10                   | SZ/SZA          | A            | 1.830                      | 0.708          |
| CLOCK       | 10                   | SZ/SZA          | D            | 2.214                      | 0.730          |
| CLOCK       | 10                   | SZ/SZA          | R            | 1.351                      | 0.908          |
| CNR1        | 17                   | SZ/SZA          | A            | 3.898                      | 0.389          |
| CNR1        | 17                   | SZ/SZA          | D            | 4.189                      | 0.404          |
| CNR1        | 17                   | SZ/SZA          | R            | 1.603                      | 0.957          |
| CRY2        | 7                    | SZ/SZA          | A            | 1.267                      | 0.767          |
| CRY2        | 7                    | SZ/SZA          | R            | 1.576                      | 0.788          |
| CRY2        | 7                    | SZ/SZA          | D            | 0.701                      | 0.954          |
| CSNK1D      | 1                    | SZ/SZA          | A            | 2.253                      | 0.137          |
| CSNK1D      | 1                    | SZ/SZA          | D            | 2.015                      | 0.173          |
| CSNK1D      | 1                    | SZ/SZA          | R            | 0.733                      | 0.425          |
| CSNK1E      | 9                    | SZ/SZA          | D            | 3.815                      | 0.347          |
| CSNK1E      | 9                    | SZ/SZA          | R            | 2.768                      | 0.564          |
| CSNK1E      | 9                    | SZ/SZA          | A            | 1.423                      | 0.814          |

|                 |    |        |   |        |       |
|-----------------|----|--------|---|--------|-------|
| <i>CSNK2A1</i>  | 7  | SZ/SZA | R | 3.126  | 0.381 |
| <i>CSNK2A1</i>  | 7  | SZ/SZA | D | 2.752  | 0.470 |
| <i>CSNK2A1</i>  | 7  | SZ/SZA | A | 1.354  | 0.719 |
| <i>DBP</i>      | 2  | SZ/SZA | D | 2.864  | 0.173 |
| <i>DBP</i>      | 2  | SZ/SZA | R | 2.134  | 0.251 |
| <i>DBP</i>      | 2  | SZ/SZA | A | 1.570  | 0.371 |
| <i>EGR3</i>     | 3  | SZ/SZA | R | 1.294  | 0.469 |
| <i>EGR3</i>     | 3  | SZ/SZA | A | 1.601  | 0.495 |
| <i>EGR3</i>     | 3  | SZ/SZA | D | 0.774  | 0.759 |
| <i>FLJ20516</i> | 5  | SZ/SZA | R | 5.296  | 0.108 |
| <i>FLJ20516</i> | 5  | SZ/SZA | A | 3.515  | 0.237 |
| <i>FLJ20516</i> | 5  | SZ/SZA | D | 3.622  | 0.319 |
| <i>NFIL3</i>    | 9  | SZ/SZA | D | 4.240  | 0.276 |
| <i>NFIL3</i>    | 9  | SZ/SZA | R | 3.605  | 0.369 |
| <i>NFIL3</i>    | 9  | SZ/SZA | A | 3.128  | 0.438 |
| <i>NPAS2</i>    | 60 | SZ/SZA | R | 11.321 | 0.034 |
| <i>NPAS2</i>    | 60 | SZ/SZA | D | 7.892  | 0.205 |
| <i>NPAS2</i>    | 60 | SZ/SZA | A | 5.146  | 0.558 |
| <i>NR1D1</i>    | 6  | SZ/SZA | R | 4.633  | 0.182 |
| <i>NR1D1</i>    | 6  | SZ/SZA | D | 2.144  | 0.543 |
| <i>NR1D1</i>    | 6  | SZ/SZA | A | 0.572  | 0.945 |
| <i>PER1</i>     | 2  | SZ/SZA | R | 1.525  | 0.481 |
| <i>PER1</i>     | 2  | SZ/SZA | D | 0.596  | 0.640 |
| <i>PER1</i>     | 2  | SZ/SZA | A | 0.389  | 0.725 |
| <i>PER2</i>     | 9  | SZ/SZA | R | 6.944  | 0.068 |
| <i>PER2</i>     | 9  | SZ/SZA | A | 4.563  | 0.209 |
| <i>PER2</i>     | 9  | SZ/SZA | D | 1.671  | 0.769 |
| <i>PER3</i>     | 14 | SZ/SZA | A | 4.723  | 0.245 |
| <i>PER3</i>     | 14 | SZ/SZA | D | 4.379  | 0.319 |
| <i>PER3</i>     | 14 | SZ/SZA | R | 4.420  | 0.349 |
| <i>RORB</i>     | 46 | SZ/SZA | D | 9.945  | 0.056 |
| <i>RORB</i>     | 46 | SZ/SZA | A | 5.510  | 0.407 |
| <i>RORB</i>     | 46 | SZ/SZA | R | 4.505  | 0.699 |
| <i>TIMELESS</i> | 6  | SZ/SZA | R | 3.823  | 0.210 |
| <i>TIMELESS</i> | 6  | SZ/SZA | A | 3.599  | 0.220 |

|                 |   |        |   |       |       |
|-----------------|---|--------|---|-------|-------|
| <i>TIMELESS</i> | 6 | SZ/SZA | D | 3.378 | 0.298 |
|-----------------|---|--------|---|-------|-------|

SNP = single nucleotide polymorphism.

*Supplementary Table 3. Associations between single nucleotide polymorphisms and body mass index (BMI), age at onset (AAO), and presence or absence of psychosis among the bipolar I disorder (BPI) cases*

| <b>Gene</b>     | <b>Association with BPI</b> | <b>BMI p-value</b> | <b>AAO p-value</b> | <b>Psychosis versus controls</b> | <b>No psychosis versus controls</b> | <b>Psychosis versus no psychosis</b> |
|-----------------|-----------------------------|--------------------|--------------------|----------------------------------|-------------------------------------|--------------------------------------|
| <i>ARNTL</i>    | 0.057                       | 0.594              | 0.997              | 0.023                            | 0.6531                              | 0.0773                               |
| <i>ARNTL</i>    | 0.038                       | 0.456              | 0.777              | 0.018                            | 0.9894                              | 0.1662                               |
| <i>ARNTL</i>    | 0.884                       | 0.030              | 0.550              | 0.852                            | 0.9861                              | 0.8978                               |
| <i>ARNTL</i>    | 0.417                       | 0.003              | 0.806              | 0.377                            | 0.5947                              | 0.9939                               |
| <i>ARNTL2</i>   | 0.260                       | 0.926              | 0.444              | 0.054                            | 0.2238                              | 0.0279                               |
| <i>ARNTL2</i>   | 0.739                       | 0.750              | 0.723              | 0.710                            | 0.0608                              | 0.03345                              |
| <i>ARNTL2</i>   | 0.880                       | 0.040              | 0.116              | 0.685                            | 0.2793                              | 0.1939                               |
| <i>ARNTL2</i>   | 0.075                       | 0.443              | 0.200              | 0.186                            | 0.04827                             | 0.2164                               |
| <i>ARNTL2</i>   | 0.775                       | 0.530              | 0.016              | 0.918                            | 0.3851                              | 0.3518                               |
| <i>CLOCK</i>    | 0.413                       | 0.129              | 0.372              | 0.905                            | 0.02774                             | 0.02349                              |
| <i>CNR1</i>     | 0.120                       | 0.980              | 0.971              | 0.046                            | 0.734                               | 0.3988                               |
| <i>CNR1</i>     | 0.105                       | 0.966              | 0.947              | 0.043                            | 0.673                               | 0.4311                               |
| <i>CRY2</i>     | 0.546                       | 0.019              | 0.001              | 0.845                            | 0.2263                              | 0.2728                               |
| <i>CRY2</i>     | 0.508                       | 0.011              | 0.978              | 0.825                            | 0.3407                              | 0.4121                               |
| <i>CRY2</i>     | 0.604                       | 0.567              | 0.008              | 0.858                            | 0.3819                              | 0.4703                               |
| <i>CRY2</i>     | 0.094                       | 0.351              | 0.511              | 0.044                            | 0.5373                              | 0.5568                               |
| <i>CRY2</i>     | 0.026                       | 0.372              | 0.175              | 0.019                            | 0.09421                             | 0.7322                               |
| <i>CRY2</i>     | 0.329                       | 0.259              | 0.005              | 0.348                            | 0.5551                              | 0.9885                               |
| <i>CSNK1E</i>   | 0.804                       | 0.303              | 0.364              | 0.199                            | 0.03028                             | 0.001948                             |
| <i>CSNK1E</i>   | 0.392                       | 0.203              | 0.608              | 0.104                            | 0.1575                              | 0.01235                              |
| <i>CSNK1E</i>   | 0.021                       | 0.145              | 0.055              | 0.055                            | 0.01691                             | 0.2531                               |
| <i>CSNK1E</i>   | 0.050                       | 0.568              | 0.062              | 0.097                            | 0.0334                              | 0.2661                               |
| <i>CSNK2A1</i>  | 0.489                       | 0.350              | 0.385              | 0.812                            | 0.03017                             | 0.06449                              |
| <i>CSNK2A1</i>  | 0.346                       | 0.069              | 0.567              | 0.815                            | 0.04345                             | 0.06672                              |
| <i>EGR3</i>     | 0.006                       | 0.343              | 0.442              | 0.003                            | 0.08027                             | 0.9968                               |
| <i>FLJ20516</i> | 0.051                       | 0.804              | 0.570              | 0.046                            | 0.4063                              | 0.7021                               |
| <i>NFIL3</i>    | 0.616                       | 0.007              | 0.494              | 0.599                            | 0.5722                              | 0.3839                               |
| <i>NFIL3</i>    | 0.322                       | 0.046              | 0.958              | 0.305                            | 0.6985                              | 0.8136                               |
| <i>NPAS2</i>    | 0.601                       | 0.861              | 0.048              | 0.737                            | 0.01469                             | 0.0108                               |
| <i>NPAS2</i>    | 0.909                       | 0.203              | 0.971              | 0.570                            | 0.02542                             | 0.01397                              |
| <i>NPAS2</i>    | 0.463                       | 0.190              | 0.709              | 0.167                            | 0.1942                              | 0.02635                              |

|       |       |       |       |       |         |         |
|-------|-------|-------|-------|-------|---------|---------|
| NPAS2 | 0.828 | 0.388 | 0.260 | 0.694 | 0.05169 | 0.03619 |
| NPAS2 | 0.745 | 0.357 | 0.631 | 0.865 | 0.04439 | 0.03813 |
| NPAS2 | 0.482 | 0.788 | 0.760 | 0.912 | 0.04083 | 0.05618 |
| NPAS2 | 0.606 | 0.044 | 0.863 | 0.915 | 0.07724 | 0.07277 |
| NPAS2 | 0.010 | 0.370 | 0.197 | 0.001 | 0.7912  | 0.09745 |
| NPAS2 | 0.549 | 0.022 | 0.775 | 0.839 | 0.1722  | 0.1304  |
| NPAS2 | 0.100 | 0.809 | 0.110 | 0.316 | 0.04487 | 0.1635  |
| NPAS2 | 0.208 | 0.210 | 0.048 | 0.454 | 0.05809 | 0.1669  |
| NPAS2 | 0.747 | 0.011 | 0.295 | 0.466 | 0.401   | 0.2026  |
| NPAS2 | 0.737 | 0.008 | 0.050 | 0.546 | 0.6728  | 0.4325  |
| NPAS2 | 0.035 | 0.660 | 0.427 | 0.028 | 0.4605  | 0.5564  |
| NPAS2 | 0.154 | 0.329 | 0.765 | 0.157 | 0.1531  | 0.5703  |
| NPAS2 | 0.196 | 0.244 | 0.026 | 0.250 | 0.2509  | 0.706   |
| NPAS2 | 0.018 | 0.654 | 0.837 | 0.050 | 0.1121  | 0.7204  |
| NPAS2 | 0.688 | 0.015 | 0.089 | 0.681 | 0.9883  | 0.8184  |
| NPAS2 | 0.798 | 0.030 | 0.232 | 0.927 | 0.9732  | 0.9329  |
| NPAS2 | 0.883 | 0.028 | 0.547 | 0.771 | 0.9181  | 0.9409  |
| NR1D1 | 0.240 | 0.029 | 0.246 | 0.063 | 0.4445  | 0.07093 |
| NR1D1 | 0.432 | 0.242 | 0.020 | 0.578 | 0.4125  | 0.6267  |
| PER1  | 0.698 | 0.620 | 0.023 | 0.481 | 0.7613  | 0.4834  |
| PER2  | 0.192 | 0.065 | 0.126 | 0.646 | 0.01553 | 0.03398 |
| PER2  | 0.058 | 0.237 | 0.593 | 0.202 | 0.03197 | 0.1589  |
| PER2  | 0.311 | 0.024 | 0.991 | 0.455 | 0.2444  | 0.4781  |
| PER2  | 0.964 | 0.001 | 0.253 | 0.999 | 0.4951  | 0.4914  |
| PER2  | 0.175 | 0.017 | 0.989 | 0.258 | 0.3751  | 0.8414  |
| PER3  | 0.251 | 0.885 | 0.918 | 0.581 | 0.02877 | 0.05345 |
| PER3  | 0.290 | 0.765 | 0.435 | 0.646 | 0.03328 | 0.05691 |
| PER3  | 0.359 | 0.851 | 0.527 | 0.677 | 0.04752 | 0.1015  |
| PER3  | 0.442 | 0.896 | 0.016 | 0.628 | 0.06436 | 0.1173  |
| PER3  | 0.514 | 0.740 | 0.979 | 0.663 | 0.1515  | 0.2553  |
| PER3  | 0.787 | 0.564 | 0.034 | 0.864 | 0.6148  | 0.7098  |
| PER3  | 0.693 | 0.579 | 0.009 | 0.640 | 0.7046  | 0.9275  |
| PER3  | 0.534 | 0.549 | 0.049 | 0.438 | 0.6518  | 0.9874  |
| RORB  | 0.027 | 0.755 | 0.657 | 0.021 | 0.9952  | 0.1689  |
| RORB  | 0.037 | 0.616 | 0.104 | 0.189 | 0.05976 | 0.2029  |
| RORB  | 0.906 | 0.041 | 0.603 | 0.666 | 0.5593  | 0.4354  |
| RORB  | 0.671 | 0.220 | 0.002 | 0.477 | 0.8406  | 0.5309  |
| RORB  | 0.610 | 0.087 | 0.025 | 0.948 | 0.579   | 0.6113  |

|             |       |       |       |       |        |        |
|-------------|-------|-------|-------|-------|--------|--------|
| <i>RORB</i> | 0.801 | 0.038 | 0.698 | 0.740 | 0.8129 | 0.6756 |
| <i>RORB</i> | 0.027 | 0.670 | 0.989 | 0.069 | 0.4683 | 0.6976 |
| <i>RORB</i> | 0.484 | 0.093 | 0.006 | 0.472 | 0.6427 | 0.9794 |

None of the associations remained significant following Bonferroni corrections for multiple comparisons.
